# Supplementary material for: Influence of Chronic Ethanol Consumption on Apoptosis and Autophagy Following Transient Focal Cerebral Ischemia in Male Mice
Source: PubMed Central journal article supplement (PMC7145844; doi:10.1038/s41598-020-63213-2), 2020-04-09

**Influence of Chronic Ethanol Consumption on Apoptosis and Autophagy  
Following Transient Focal Cerebral Ischemia in Male Mice**

Chun Li, Jiyu Li, Guodong Xu, and Hong Sun

**Western Blots of Without I/R of Figure 4**

Cytosol cytochrome C

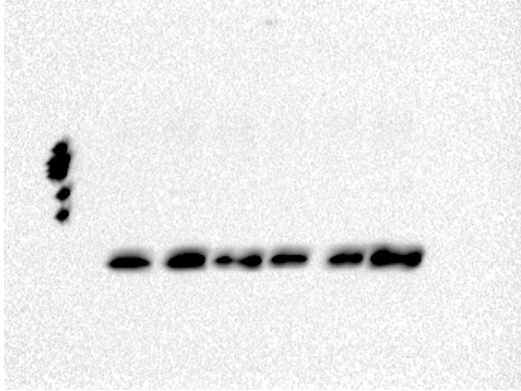

GAPDH

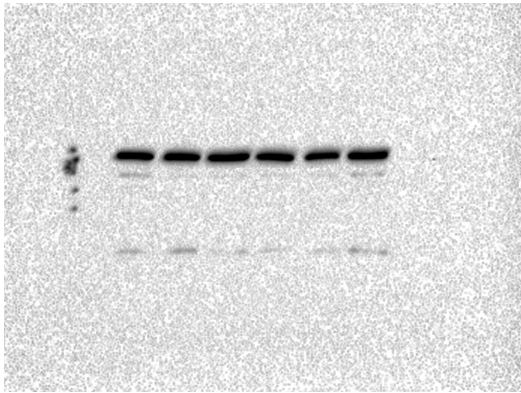

Mitochondrial cytochrome C

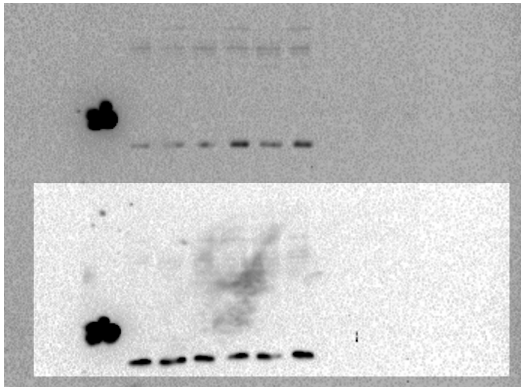

Mitochondrial AIF

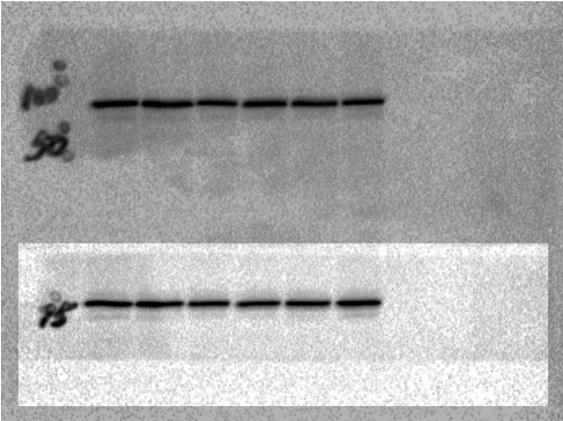

Mitochondrial COX-4

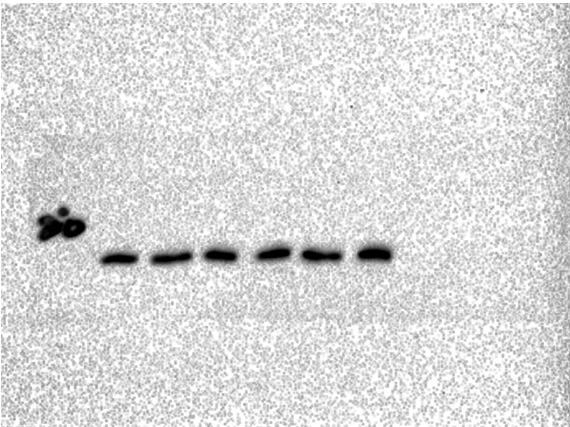

Nuclear AIF

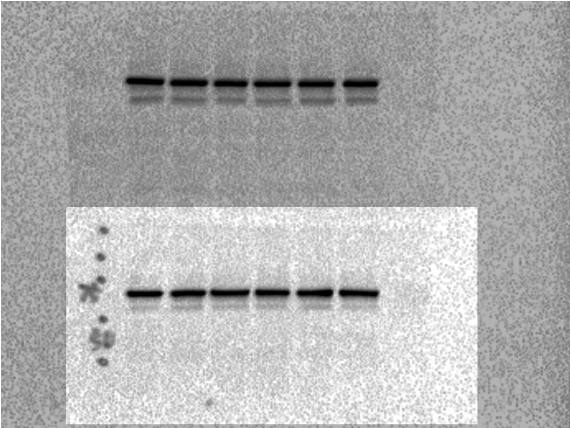

Nuclear HDAC

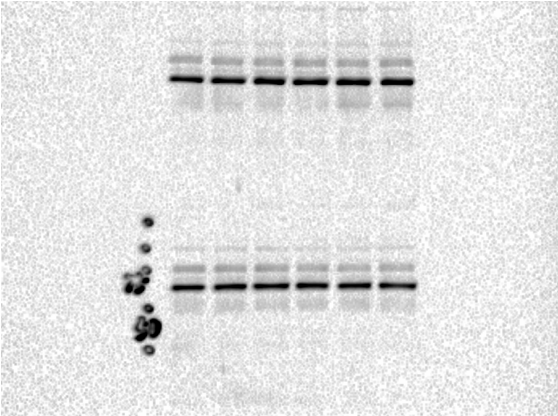

**Western Blots of With I/R of Figure 4**

Cytosol Cytochrome C and GAPDH

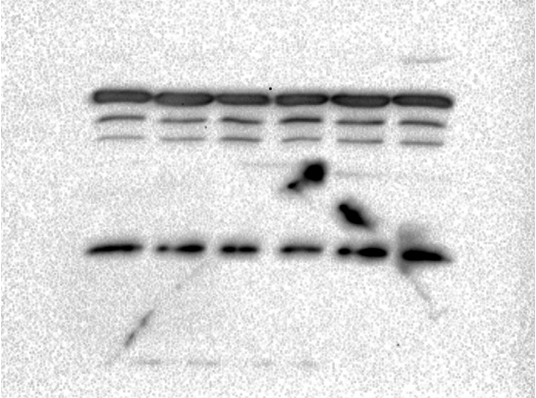

Mitochondrial cytochrome C

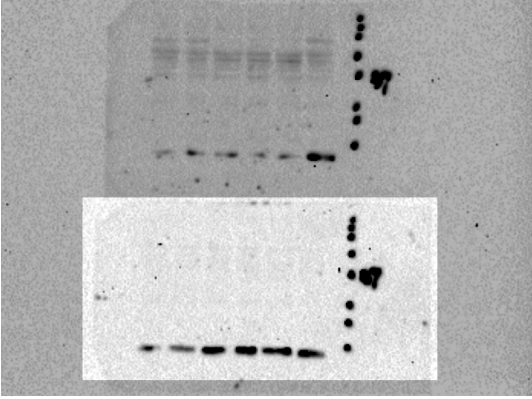

Mitochondrial COX-4

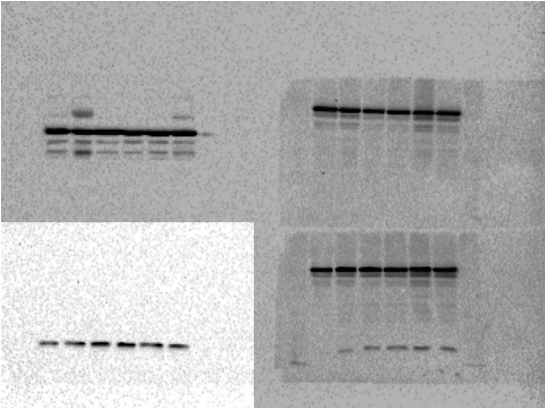

Nuclear AIF

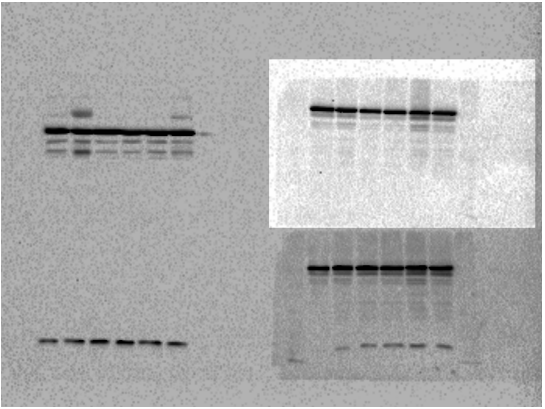

Nuclear HDAC

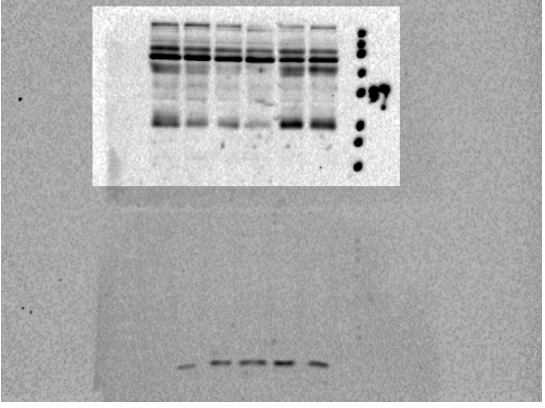

Mitochondrial AIF and COX-4

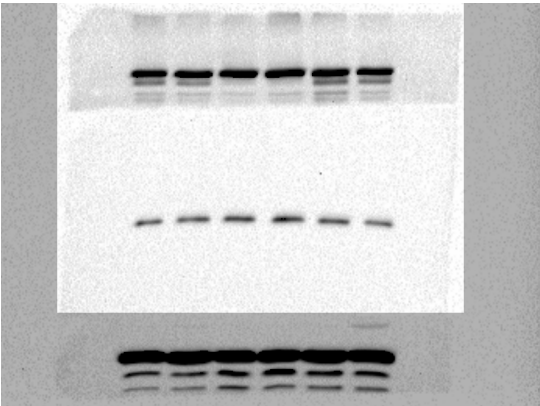

Western Blots of Figure 5

GAPDH and LC3B

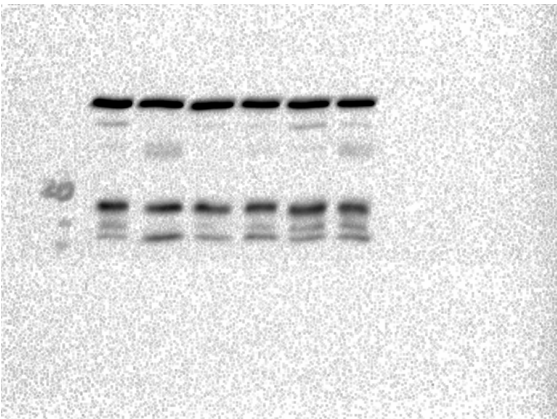

LC3B

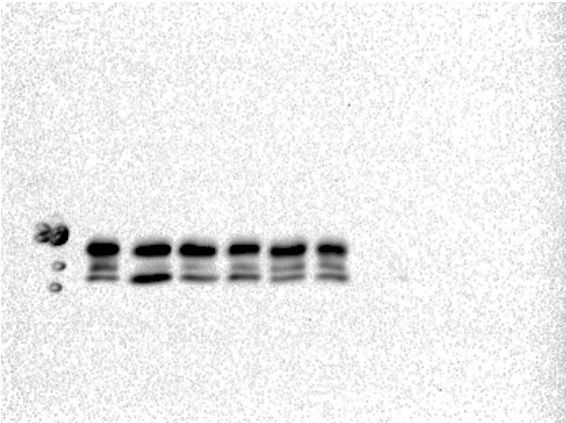

**Western Blots of Figure 6.**

Bcl-2

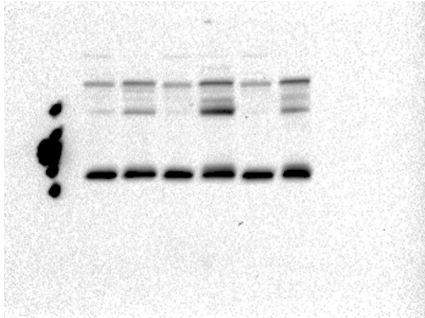

GAPDH

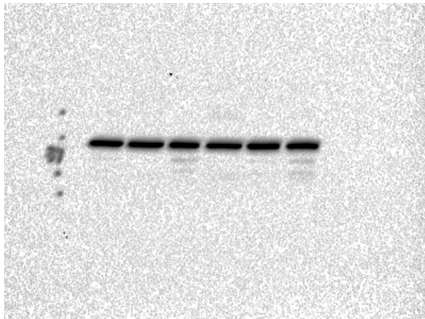

Beclin-1

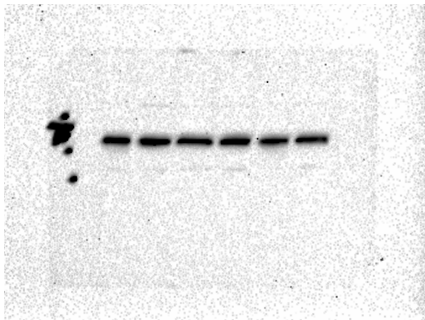

GAPDH

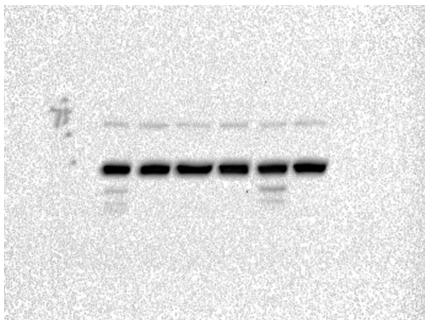

User: USER

Path: C:\Program Files (x86)\BMG\Omega\User\Data\

Test ID: 502

Test Name: Elisa 450

Date: 5/25/2018

Time: 3:41:06 PM

ID1: IL1Beta 11.15.16

Absorbance Absorbance values are displayed as OD

0.091

1. Raw Data (405 1)

|   | 1 | 2     | 3     | 4     | 5     | 6     | 7     | 8 | 9 | 10 | 11 | 12 |
|---|---|-------|-------|-------|-------|-------|-------|---|---|----|----|----|
| A |   | 0.167 | 0.309 | 0.287 | 0.324 | 0.141 | 0.405 |   |   |    |    |    |
| B |   | 1.034 | 0.983 | 0.859 | 0.896 | 0.899 | 1.092 |   |   |    |    |    |
| C |   | 0.131 | 0.152 | 0.198 | 0.26  | 0.29  | 0.334 |   |   |    |    |    |
| D |   | 0.357 | 0.372 | 0.308 | 0.707 | 0.81  | 0.971 |   |   |    |    |    |
| E |   | 0.129 | 0.158 | 0.214 | 0.182 | 0.155 | 0.268 |   |   |    |    |    |
| F |   | 1.147 | 0.776 | 1.044 | 1.759 | 1.089 | 2.387 |   |   |    |    |    |
| G |   |       |       | 0.089 |       |       |       |   |   |    |    |    |
| H |   |       |       | 0.093 |       |       |       |   |   |    |    |    |

2. Raw Data (490 2)

|   | 1 | 2     | 3     | 4     | 5     | 6     | 7 | 8 | 9 | 10 | 11 | 12 |
|---|---|-------|-------|-------|-------|-------|---|---|---|----|----|----|
| A |   | 0.042 | 0.052 | 0.052 | 0.055 | 0.038 |   |   |   |    |    |    |
| B |   | 0.088 | 0.094 | 0.1   | 0.103 | 0.103 |   |   |   |    |    |    |
| C |   | 0.041 | 0.037 | 0.043 | 0.047 | 0.051 |   |   |   |    |    |    |
| D |   | 0.056 | 0.058 | 0.052 | 0.085 | 0.095 |   |   |   |    |    |    |
| E |   | 0.036 | 0.039 | 0.061 | 0.039 |       |   |   |   |    |    |    |
| F |   | 0.123 | 0.092 | 0.117 | 0.173 |       |   |   |   |    |    |    |
| G |   |       |       | 0.033 |       |       |   |   |   |    |    |    |
| H |   |       |       | 0.037 |       |       |   |   |   |    |    |    |

0.076 0.218 0.196 0.233 0.05 0.314  
0.943 0.892 0.768 0.805 0.808 1.001  
0.04 0.061 0.107 0.169 0.199 0.243  
0.266 0.281 0.217 0.616 0.719 0.88  
0.038 0.067 0.123 0.091 0.064 0.177  
1.056 0.685 0.953 1.668 0.998 2.296

C CC 0.1812 0.0409  
CI 0.8695 0.0372  
1/2EC 0.1365 0.0328  
1/2EI 0.4965 0.1138  
2EC 0.0933 0.0204  
2EI 1.276 0.2431

100 22.573  
479.94 20.516  
75.345 18.08  
274.06 62.818  
51.518 11.268  
704.32 134.2

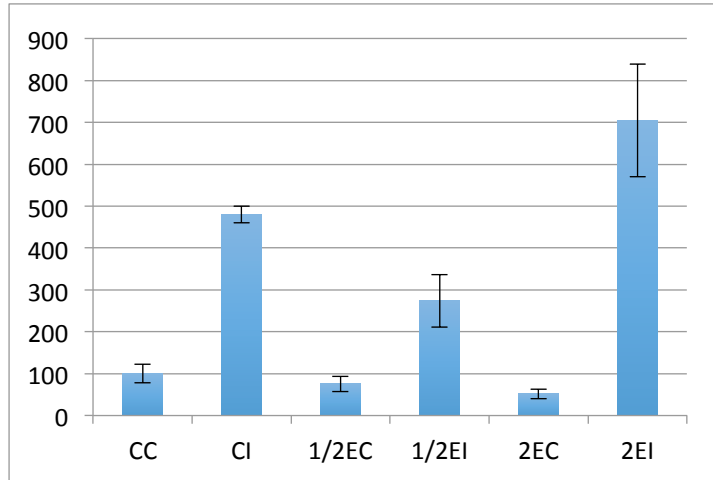

Supplement: 41598_2020_63213_MOESM1_ESM.pdf [file 41598_2020_63213_MOESM1_ESM.pdf]
